# Supplementary material for: Associations between metabolic disorders and risk of cancer in Danish men and women – a nationwide cohort study
Source: PubMed Central journal article supplement (PMC4762170; doi:10.1186/s12885-016-2122-7), 2016-02-22

## **SUPPLEMENTAL MATERIAL**

**TABLE S1.** Population characteristics at study entry

**TABLE S2.** Rate ratios of cancer associated with diabetes, hypertension and hypercholesterolemia by calendar year intervals

**FIGURE S1.** Rate ratios of cancer associated with diabetes, hypertension and hypercholesterolemia according to duration of metabolic disorder

**FIGURE S2.** Rate ratios of subtypes of cancer associated with diabetes, hypertension and hypercholesterolemia according to duration of metabolic disorder

**TABLE S1: The study population at study entry**

| <b>Variable</b>                      | <b>Men</b>       | <b>Women</b>     | <b>Total</b>    |
|--------------------------------------|------------------|------------------|-----------------|
| Population, <i>n</i> (%)             | 2,401,193 (49.8) | 2,424,949 (50.2) | 4,826,142 (100) |
| Age (mean years) (SD)                | 40.3 (18.1)      | 42.4 (19.6)      | 41.4 (18.9)     |
| Follow-up (mean years) (SD)          | 12.6 (5.8)       | 12.6 (5.7)       | 12.6 (5.7)      |
| Diabetes, <i>n</i> (%)               | 34,548 (1.4)     | 31,142 (1.3)     | 65,690 (1.4)    |
| Hypertension, <i>n</i> (%)           | 64,378 (2.7)     | 89,238 (3.7)     | 153,616 (3.2)   |
| Dyslipidemia (statins), <i>n</i> (%) | 8,928 (0.4)      | 6,095 (0.3)      | 15,023 (0.3)    |

**TABLE S2A.** IRRs (95%CI) of all-site cancer in women according to duration of each metabolic disorder and calendar year, and adjusted for age\*

|                                         | <b>1996-1999</b> | <b>2000-2003</b> | <b>2004-2007</b> | <b>2008-2012</b> |
|-----------------------------------------|------------------|------------------|------------------|------------------|
| <b>Duration of diabetes</b>             |                  |                  |                  |                  |
| <b>No diabetes</b>                      | (ref.)           | (ref.)           | (ref.)           | (ref.)           |
| <b>0-&lt;9 mths</b>                     | 1.49 (1.30-1.70) | 1.64 (1.45-1.85) | 1.56 (1.40-1.75) | 1.53 (1.40-1.67) |
| <b>9 mths–1.5 years</b>                 | 1.15 (1.00-1.32) | 1.26 (1.13-1.41) | 1.29 (1.17-1.42) | 1.16 (1.07-1.26) |
| <b>&gt;1.5 years</b>                    | 0.94 (0.79-1.12) | 1.13 (1.06-1.21) | 1.16 (1.10-1.22) | 1.17 (1.13-1.21) |
| <b>Prevalent at study entry</b>         | 1.14 (1.08-1.20) | 1.04 (0.98-1.10) | 1.08 (1.01-1.16) | 1.01 (0.93-1.09) |
| <b>Duration of hypertension</b>         |                  |                  |                  |                  |
| <b>No hypertension</b>                  | (ref.)           | (ref.)           | (ref.)           | (ref.)           |
| <b>0-&lt;9 mths</b>                     | 1.10 (1.03-1.17) | 1.09 (1.03-1.15) | 1.19 (1.13-1.25) | 1.28 (1.22-1.35) |
| <b>9 mths–1.5 years</b>                 | 1.08 (1.02-1.14) | 1.02 (0.97-1.07) | 1.00 (0.96-1.05) | 1.07 (1.02-1.11) |
| <b>&gt;1.5 years</b>                    | 0.95 (0.89-1.02) | 1.06 (1.03-1.09) | 1.05 (1.02-1.07) | 1.11 (1.09-1.13) |
| <b>Prevalent at study entry</b>         | 1.06 (1.03-1.10) | 1.06 (1.03-1.10) | 1.07 (1.03-1.11) | 1.14 (1.09-1.18) |
| <b>Duration of hypercholesterolemia</b> |                  |                  |                  |                  |
| <b>No hyper-cholesterolemia</b>         | (ref.)           | (ref.)           | (ref.)           | (ref.)           |
| <b>0-&lt;9 mths</b>                     | 0.87 (0.73-1.03) | 0.88 (0.80-0.97) | 0.88 (0.83-0.94) | 0.98 (0.93-1.03) |
| <b>9 mths–1.5 years</b>                 | 0.94 (0.81-1.11) | 0.82 (0.75-0.90) | 0.92 (0.87-0.96) | 0.98 (0.94-1.02) |
| <b>&gt;1.5 years</b>                    | 0.85 (0.69-1.03) | 1.00 (0.95-1.07) | 0.96 (0.93-0.99) | 0.97 (0.95-0.99) |
| <b>Prevalent at study entry</b>         | 0.99 (0.88-1.11) | 0.94 (0.84-1.06) | 1.03 (0.92-1.16) | 0.95 (0.84-1.07) |

\*All results arise from the same model.

IRR, incidence rate ratio; mths, months; 95%CI, 95% confidence interval; ref., reference

**TABLE S2B.** IRRs (95%CI) of all-site cancer in men according to duration of each metabolic disorder and calendar year intervals, and adjusted for age\*

|                                         | <b>1996-1999</b> | <b>2000-2003</b> | <b>2004-2007</b> | <b>2008-2012</b> |
|-----------------------------------------|------------------|------------------|------------------|------------------|
| <b>Duration of diabetes</b>             |                  |                  |                  |                  |
| <b>No diabetes</b>                      | (ref.)           | (ref.)           | (ref.)           | (ref.)           |
| <b>0-&lt;9 mths</b>                     | 1.40 (1.24-1.58) | 1.66 (1.50-1.84) | 1.50 (1.37-1.64) | 1.34 (1.24-1.44) |
| <b>9 mths–1.5 years</b>                 | 1.05 (0.93-1.19) | 1.11 (1.00-1.22) | 1.13 (1.03-1.22) | 1.14 (1.06-1.22) |
| <b>&gt;1.5 years</b>                    | 1.34 (1.17-1.52) | 1.15 (1.08-1.21) | 1.11 (1.06-1.15) | 1.09 (1.06-1.12) |
| <b>Prevalent at study entry</b>         | 1.10 (1.05-1.16) | 1.05 (0.99-1.11) | 0.94 (0.88-1.01) | 0.92 (0.86-0.99) |
| <b>Duration of hypertension</b>         |                  |                  |                  |                  |
| <b>No hypertension</b>                  | (ref.)           | (ref.)           | (ref.)           | (ref.)           |
| <b>0-&lt;9 mths</b>                     | 1.30 (1.22-1.37) | 1.32 (1.26-1.40) | 1.31 (1.25-1.37) | 1.38 (1.31-1.44) |
| <b>9 mths–1.5 years</b>                 | 1.08 (1.02-1.14) | 1.04 (0.99-1.09) | 1.08 (1.04-1.13) | 1.11 (1.06-1.15) |
| <b>&gt;1.5 years</b>                    | 1.14 (1.06-1.21) | 1.07 (1.04-1.10) | 1.11 (1.08-1.13) | 1.14 (1.11-1.16) |
| <b>Prevalent at study entry</b>         | 1.08 (1.04-1.12) | 1.08 (1.04-1.12) | 1.12 (1.07-1.16) | 1.21 (1.16-1.26) |
| <b>Duration of hypercholesterolemia</b> |                  |                  |                  |                  |
| <b>No hyper-cholesterolemia</b>         | (ref.)           | (ref.)           | (ref.)           | (ref.)           |
| <b>0-&lt;9 mths</b>                     | 0.78 (0.66-0.91) | 0.85 (0.78-0.93) | 0.93 (0.88-0.98) | 0.96 (0.91-1.01) |
| <b>9 mths–1.5 years</b>                 | 1.00 (0.87-1.14) | 0.87 (0.80-0.94) | 0.92 (0.88-0.96) | 1.00 (0.96-1.04) |
| <b>&gt;1.5 years</b>                    | 0.76 (0.63-0.91) | 0.88 (0.84-0.93) | 0.95 (0.92-0.98) | 0.96 (0.94-0.98) |
| <b>Prevalent at study entry</b>         | 0.75 (0.67-0.85) | 0.92 (0.84-1.01) | 0.92 (0.84-1.01) | 0.90 (0.82-0.99) |

\*All results arise from the same model.

IRR, incidence rate ratio; mths, months; 95%CI, 95% confidence interval; ref., reference

**FIGURE S1.** Rate ratios of cancer associated with A) diabetes, B) hypertension and C) hypercholesterolemia according to duration of metabolic disorder, stratified by sex and adjusted for age.

**A) Rate ratios of cancer according to duration of diabetes**

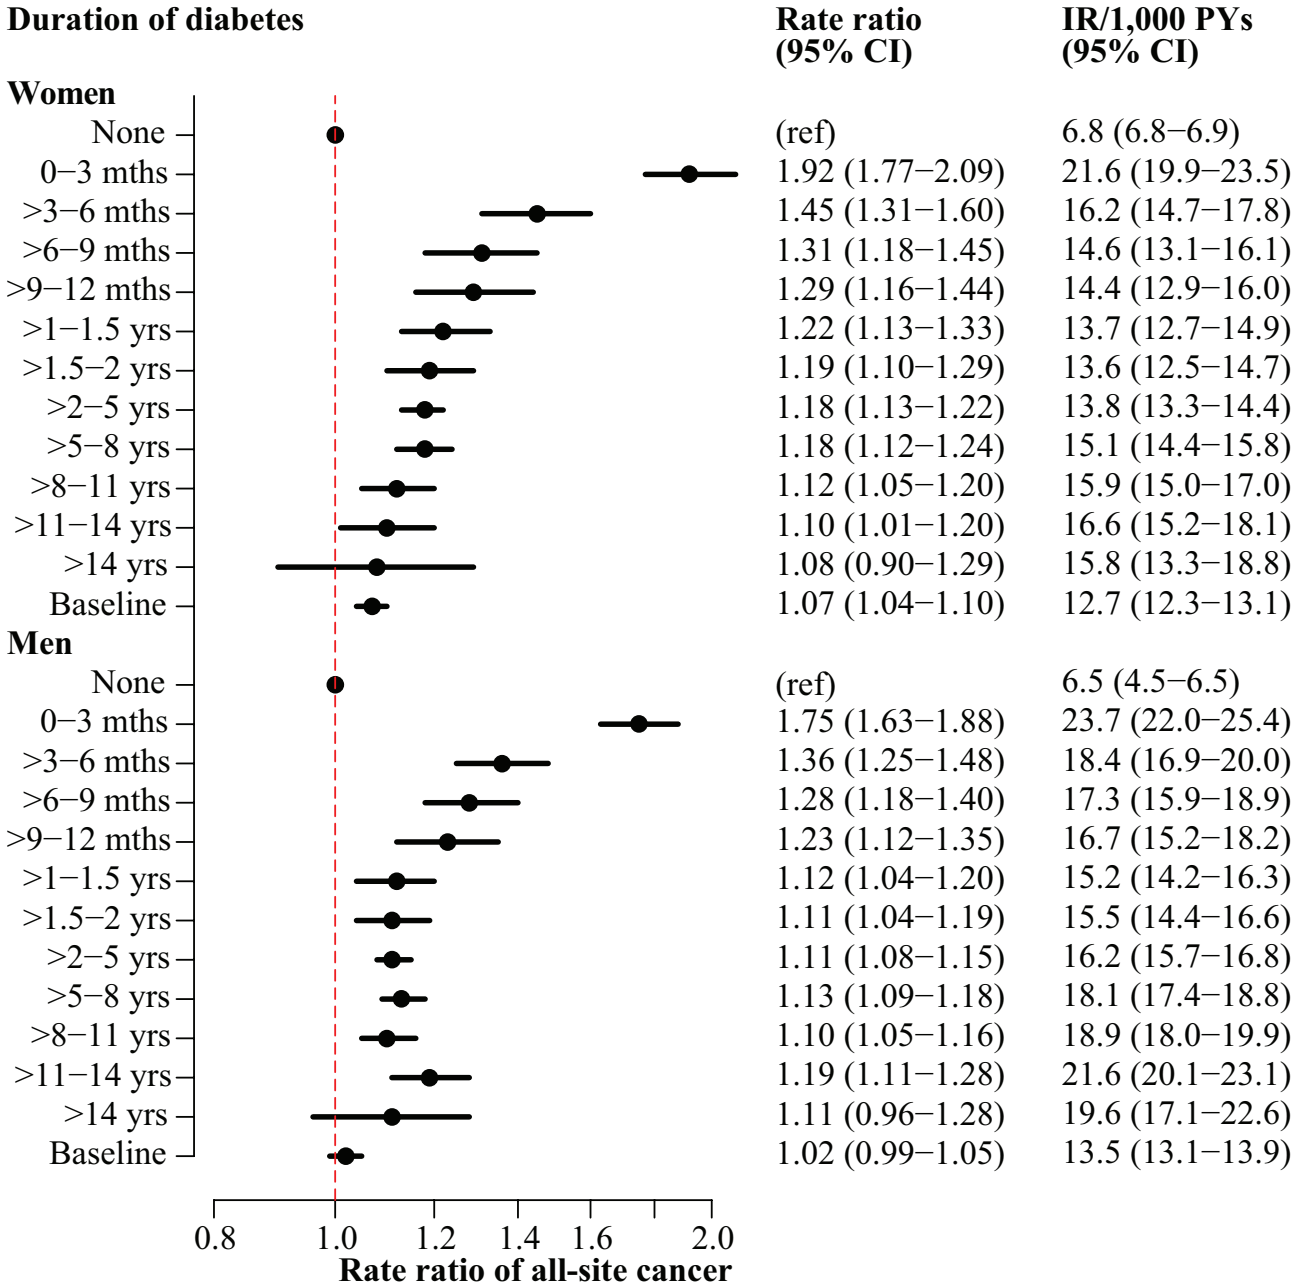

### B) Rate ratios of cancer according to duration of hypertension

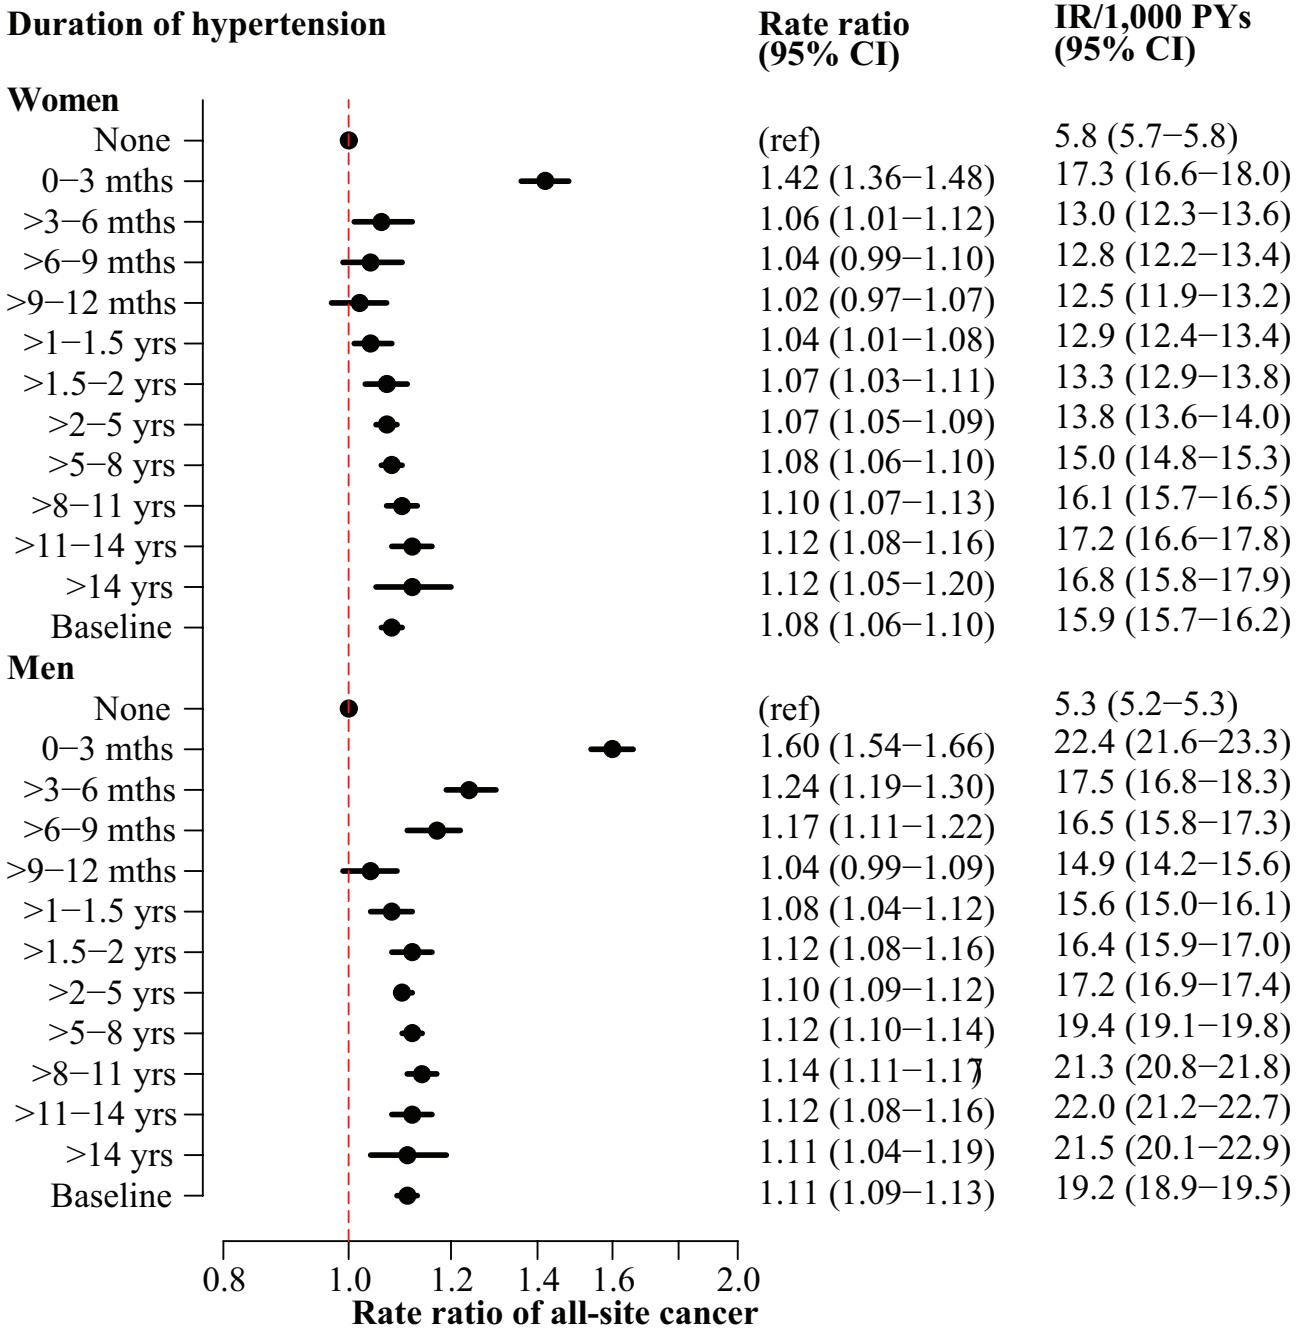

**C) Rate ratios of cancer according to duration of hypercholesterolemia**

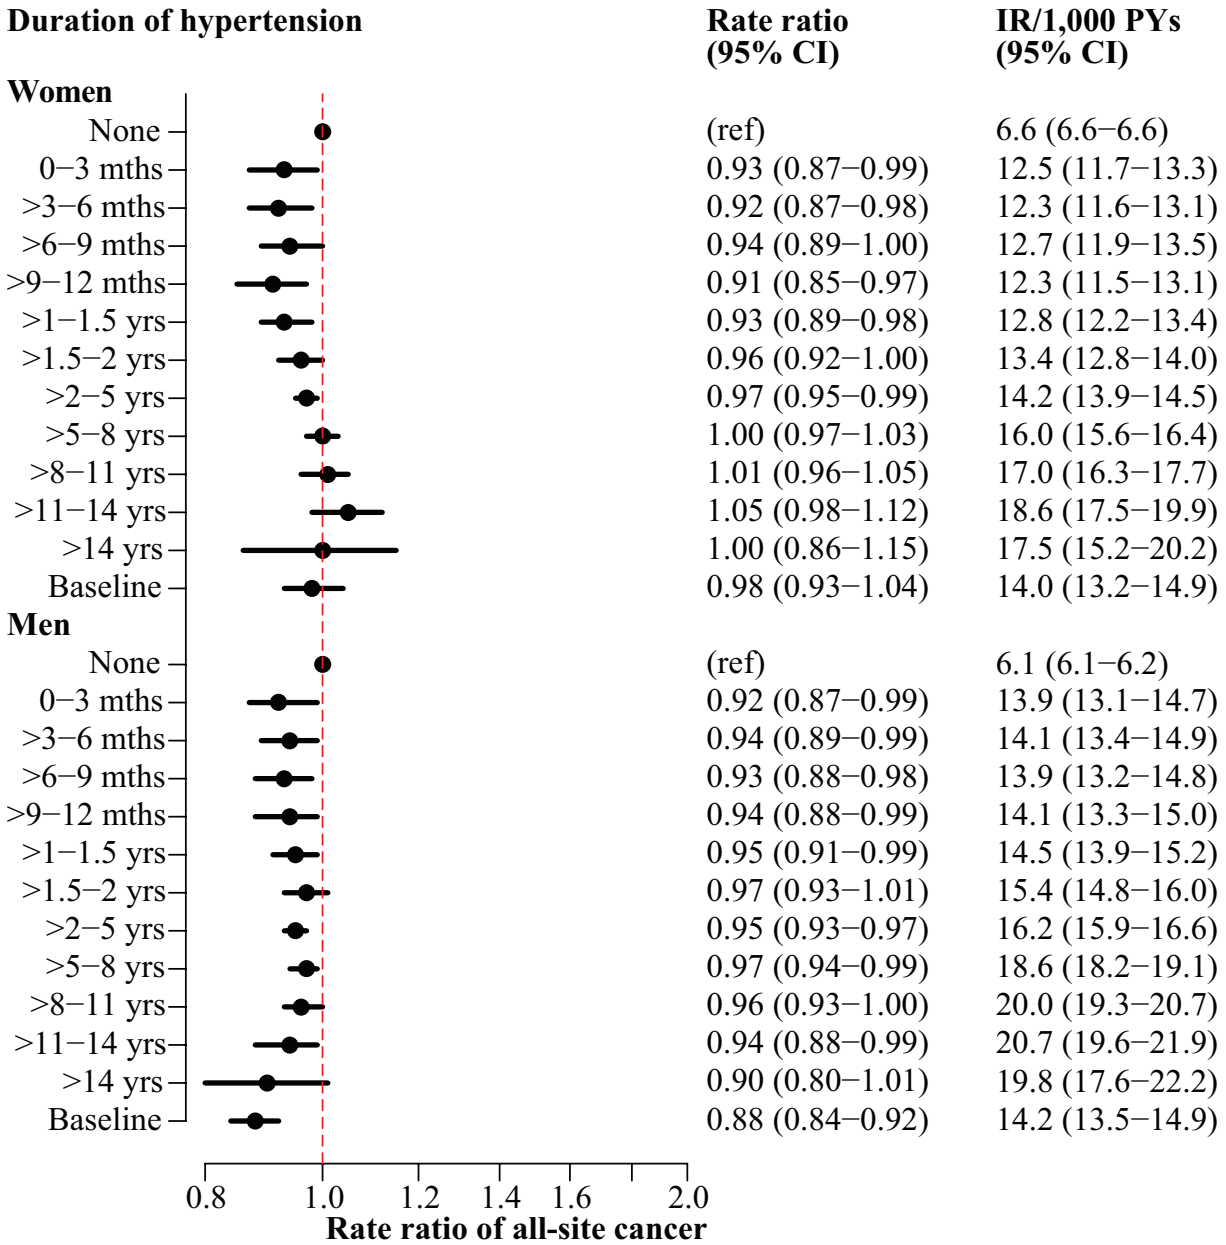

**FIGURE S2.** Rate ratios of subtypes of cancer associated with diabetes, hypertension and hypercholesterolemia according to duration of metabolic disorder

**A) Diabetes and risk of subtypes of cancer in women**

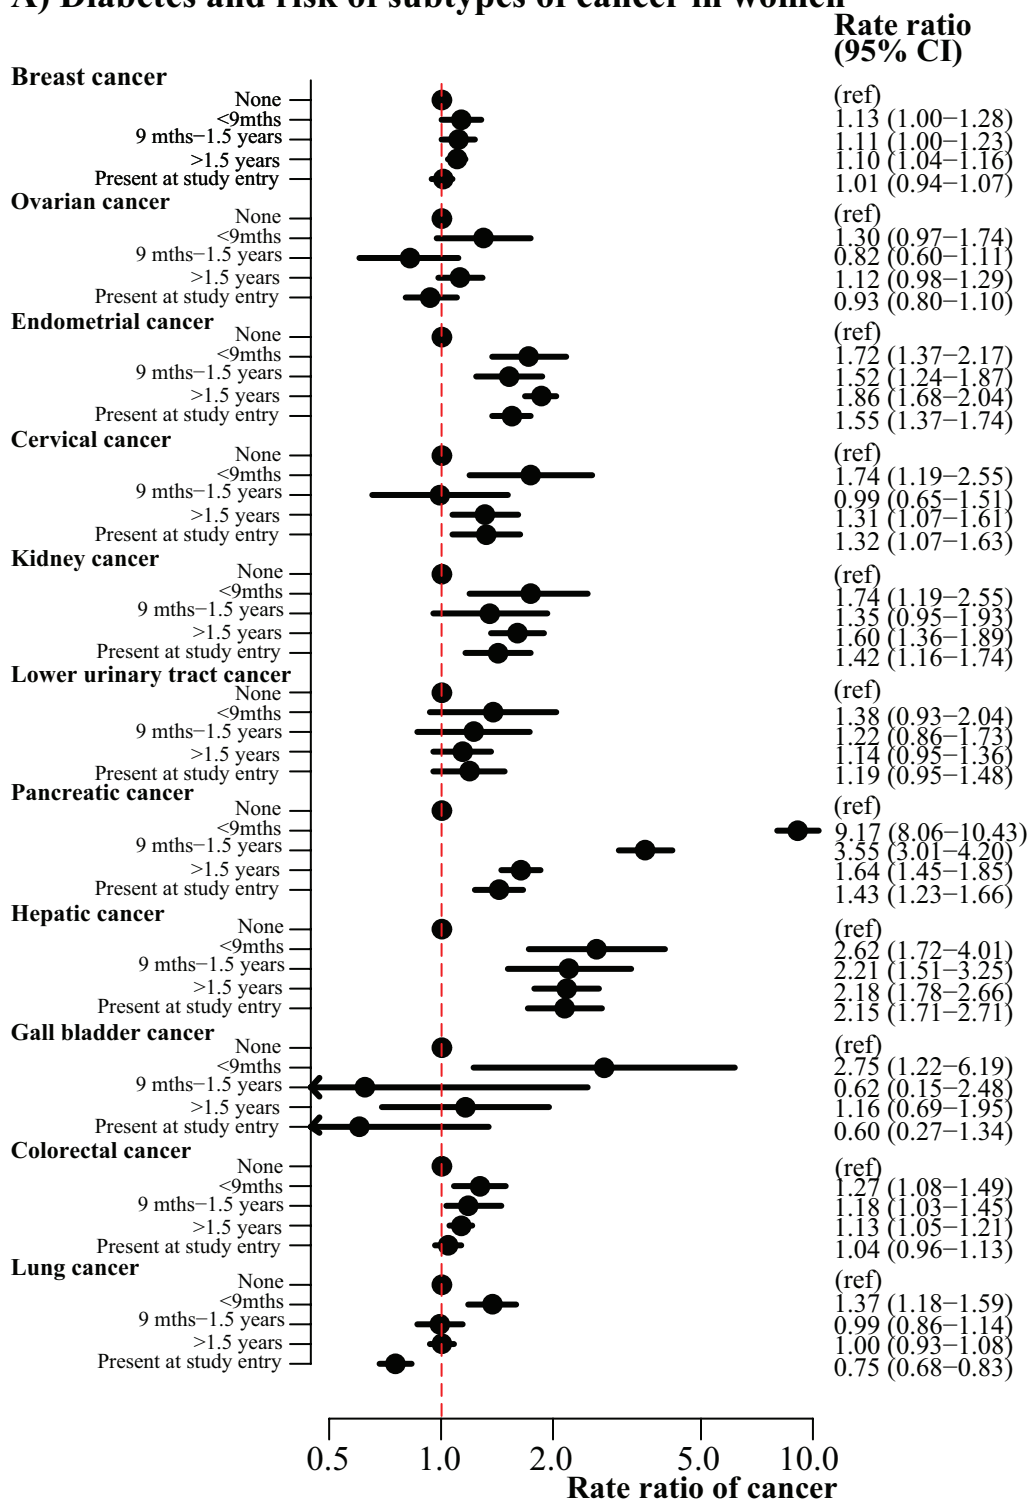



**B) Diabetes and risk of subtypes of cancer in men**

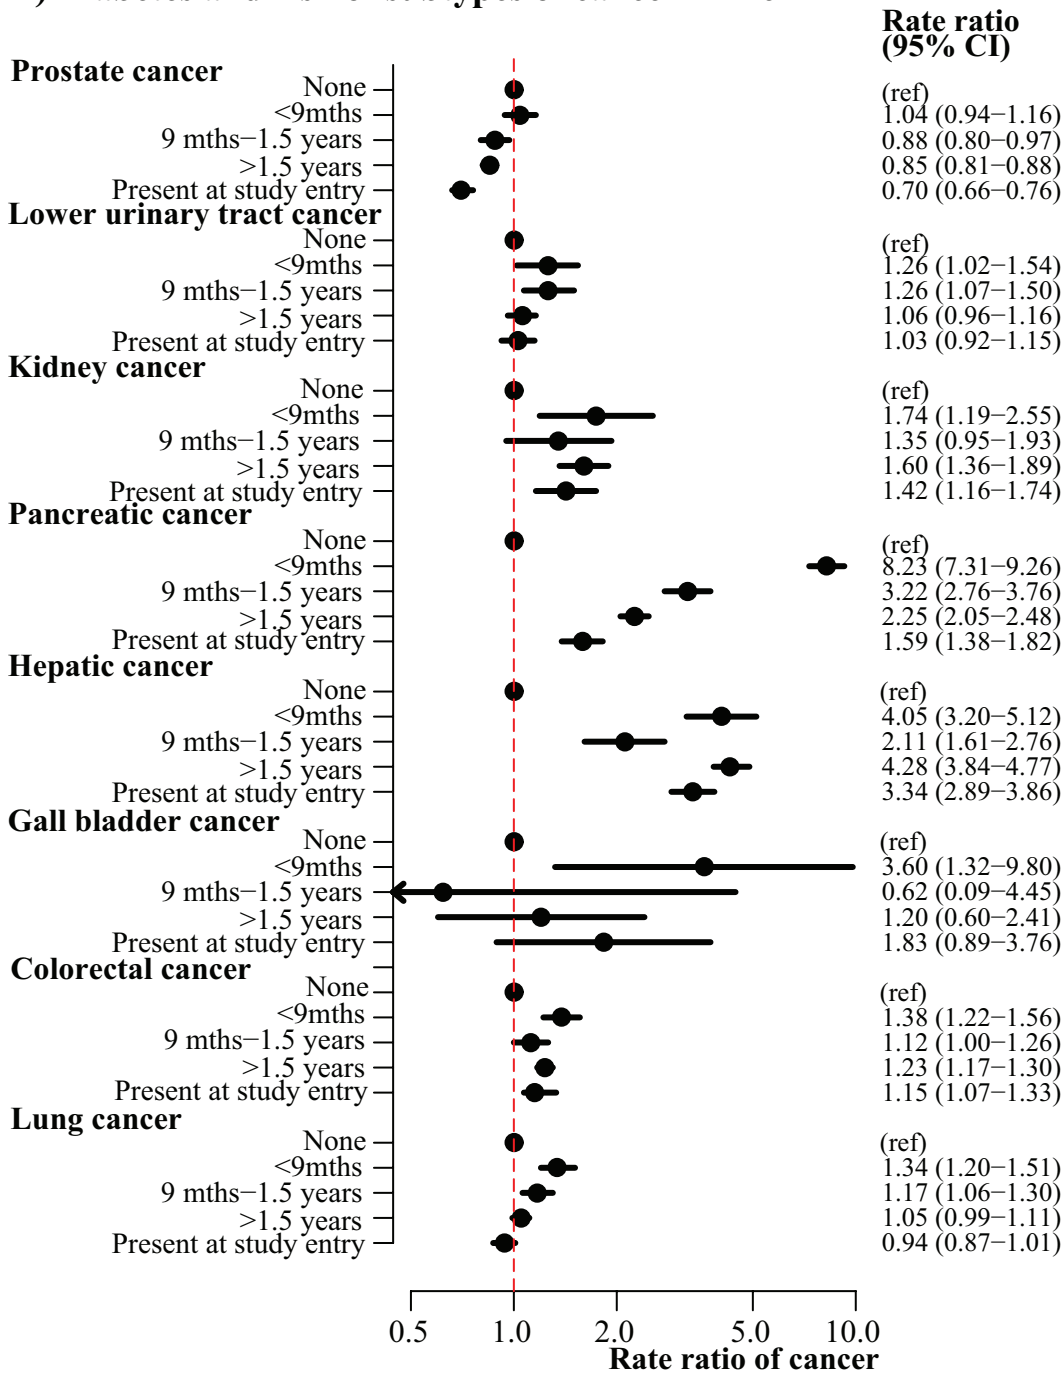

**C) Hypertension and risk of subtypes of cancer in women**

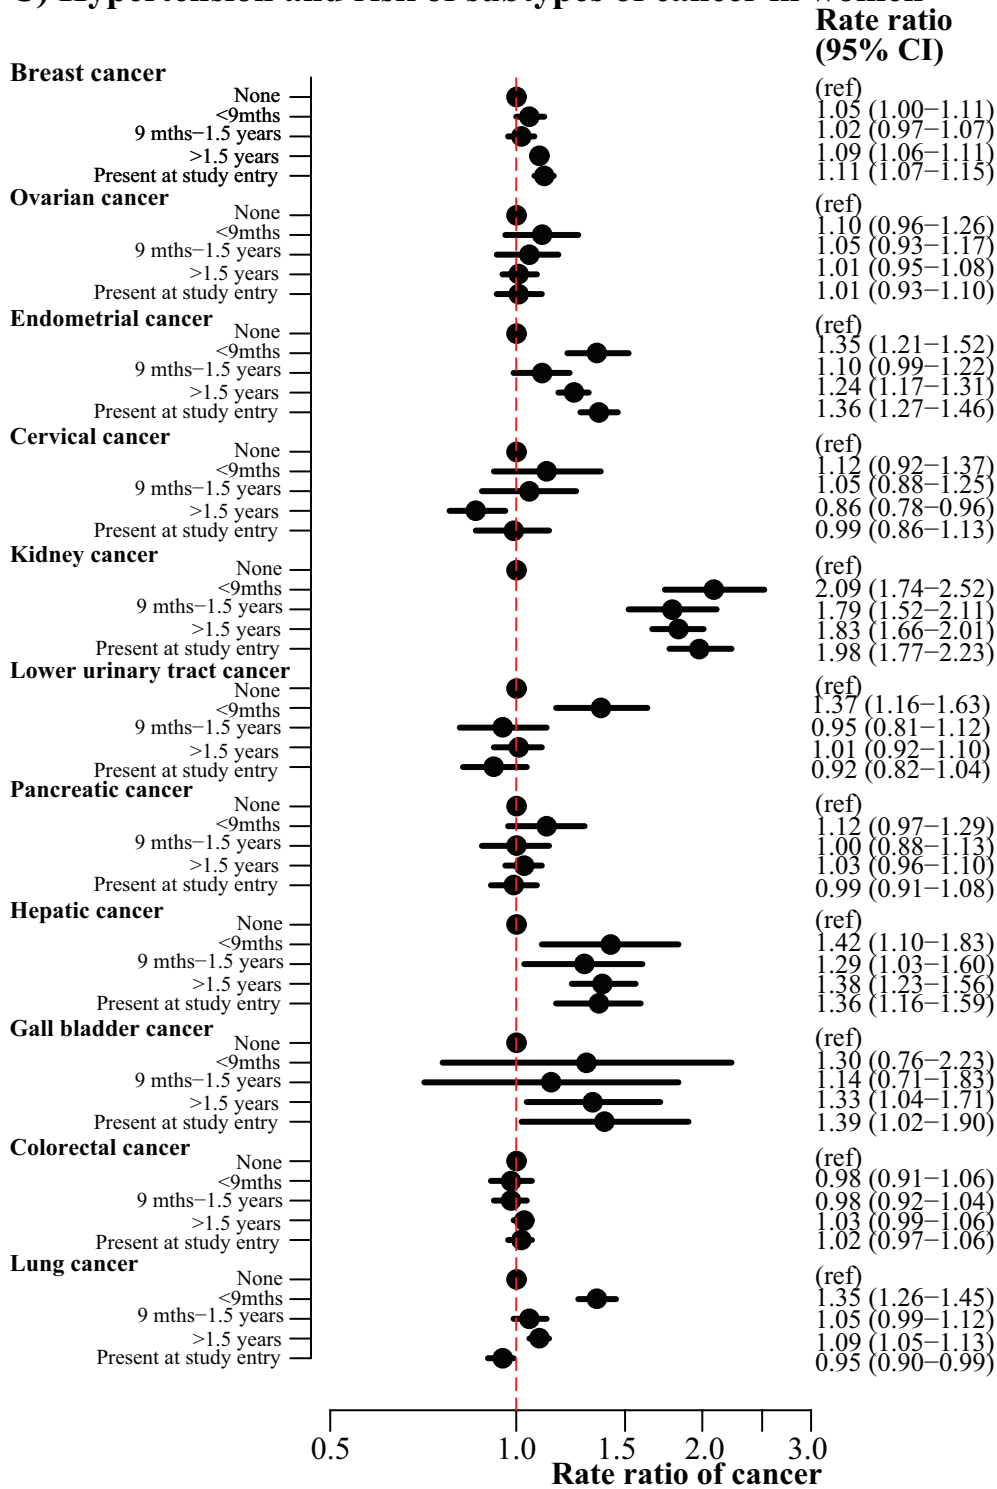

**D) Hypertension and risk of subtypes of cancer in men**

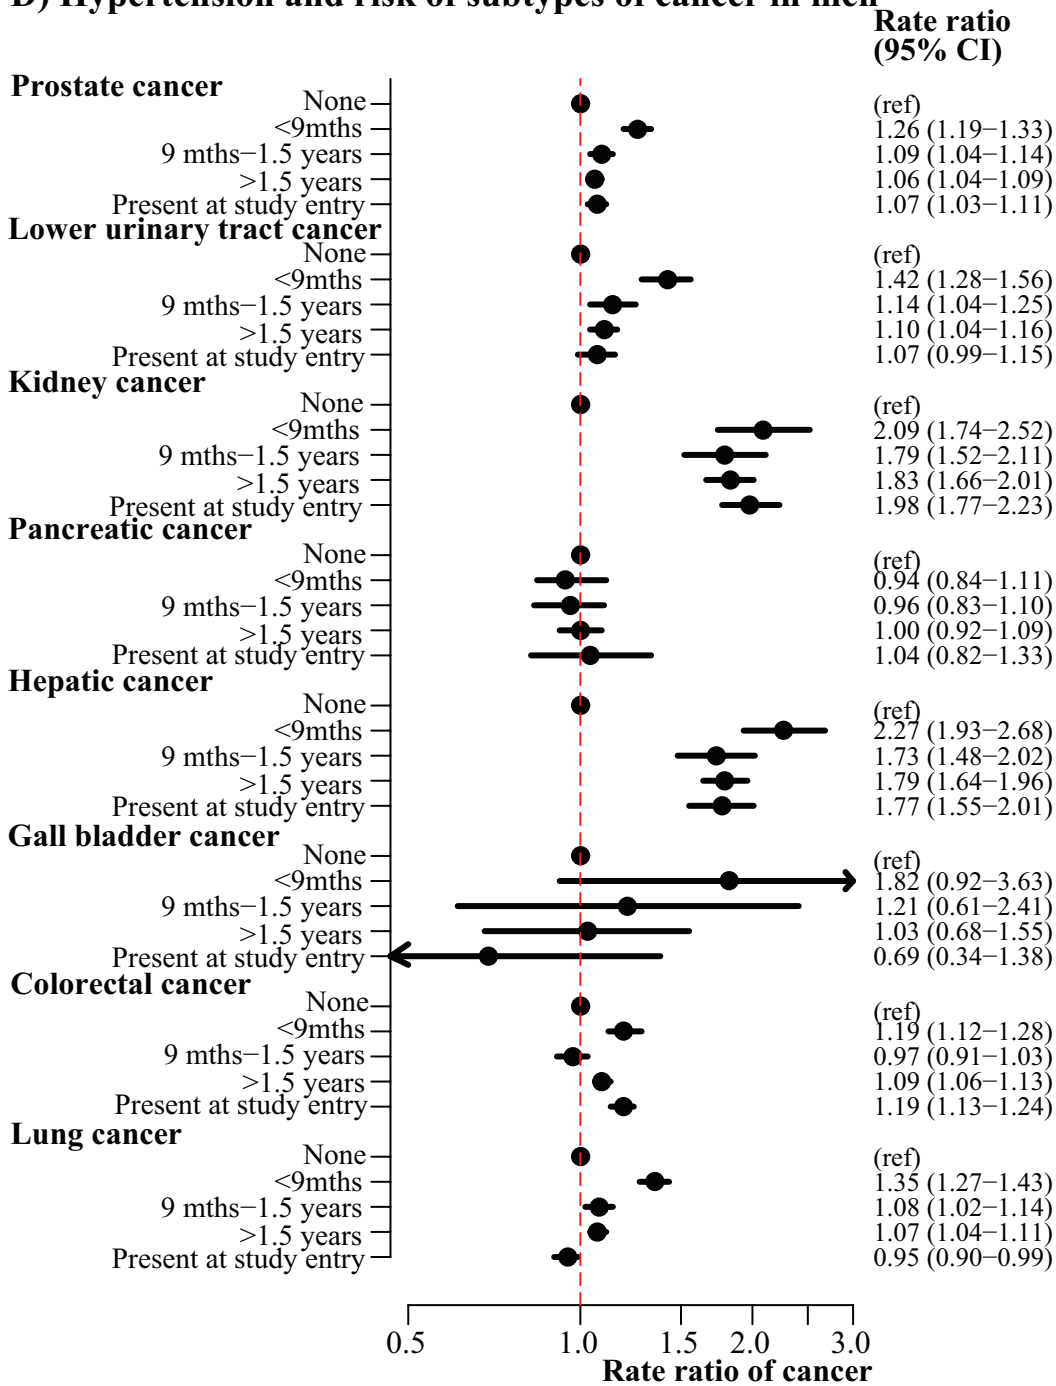

**E) Hypercholesterolemia and risk of subtypes of cancer in women**

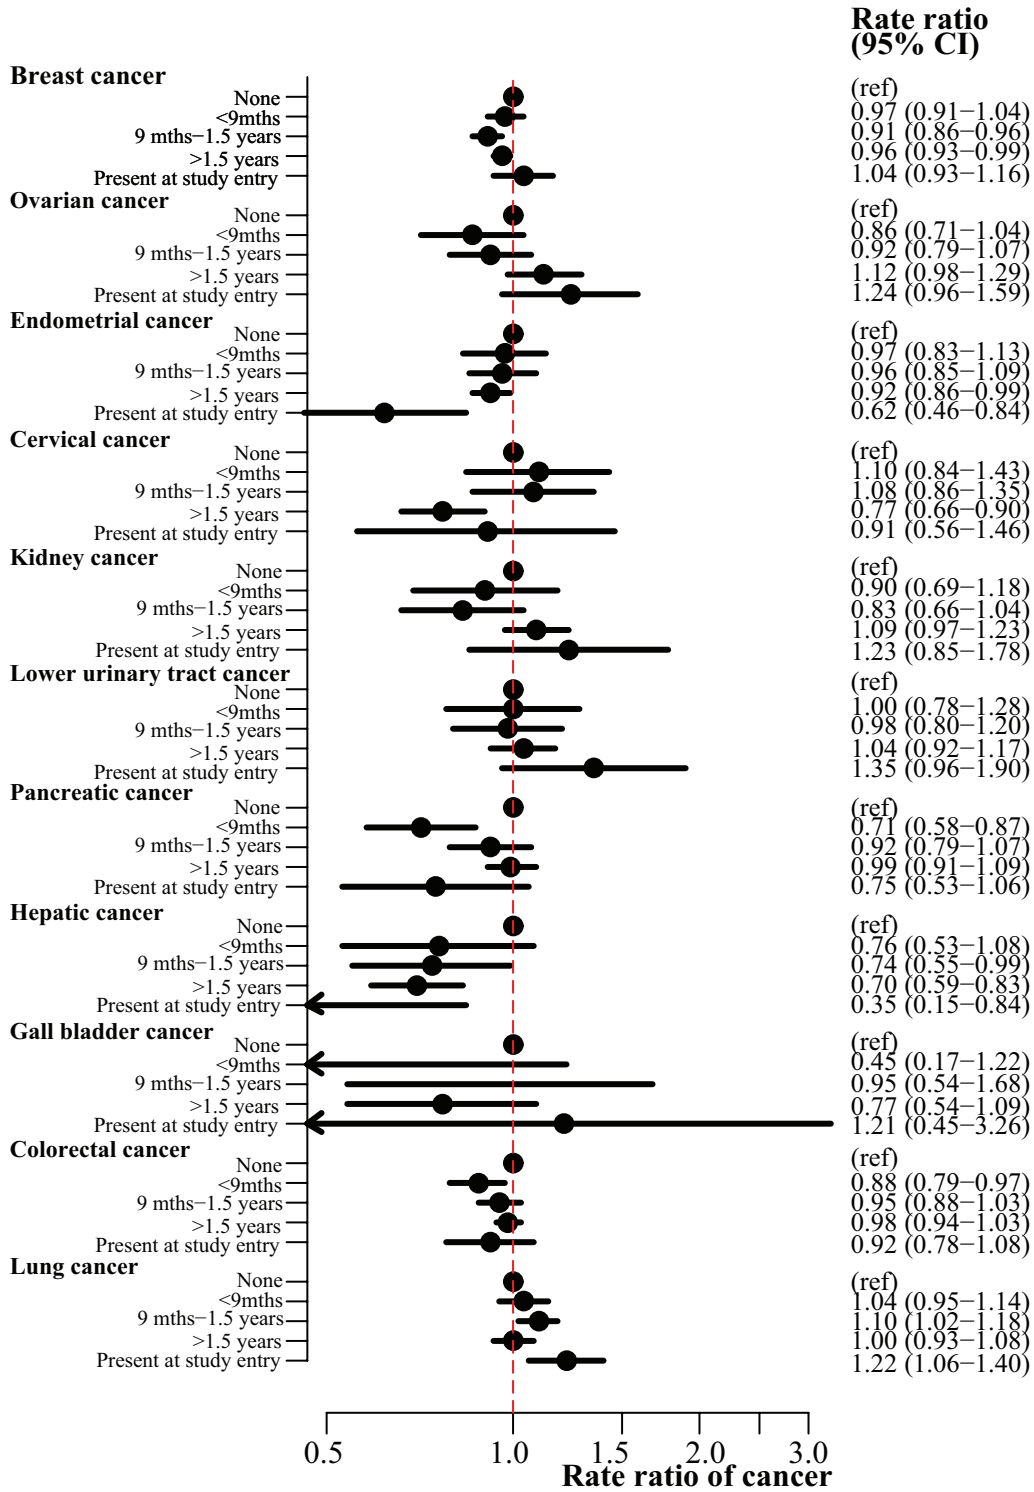

**F) Hypercholesterolemia and risk of subtypes of cancer in men**

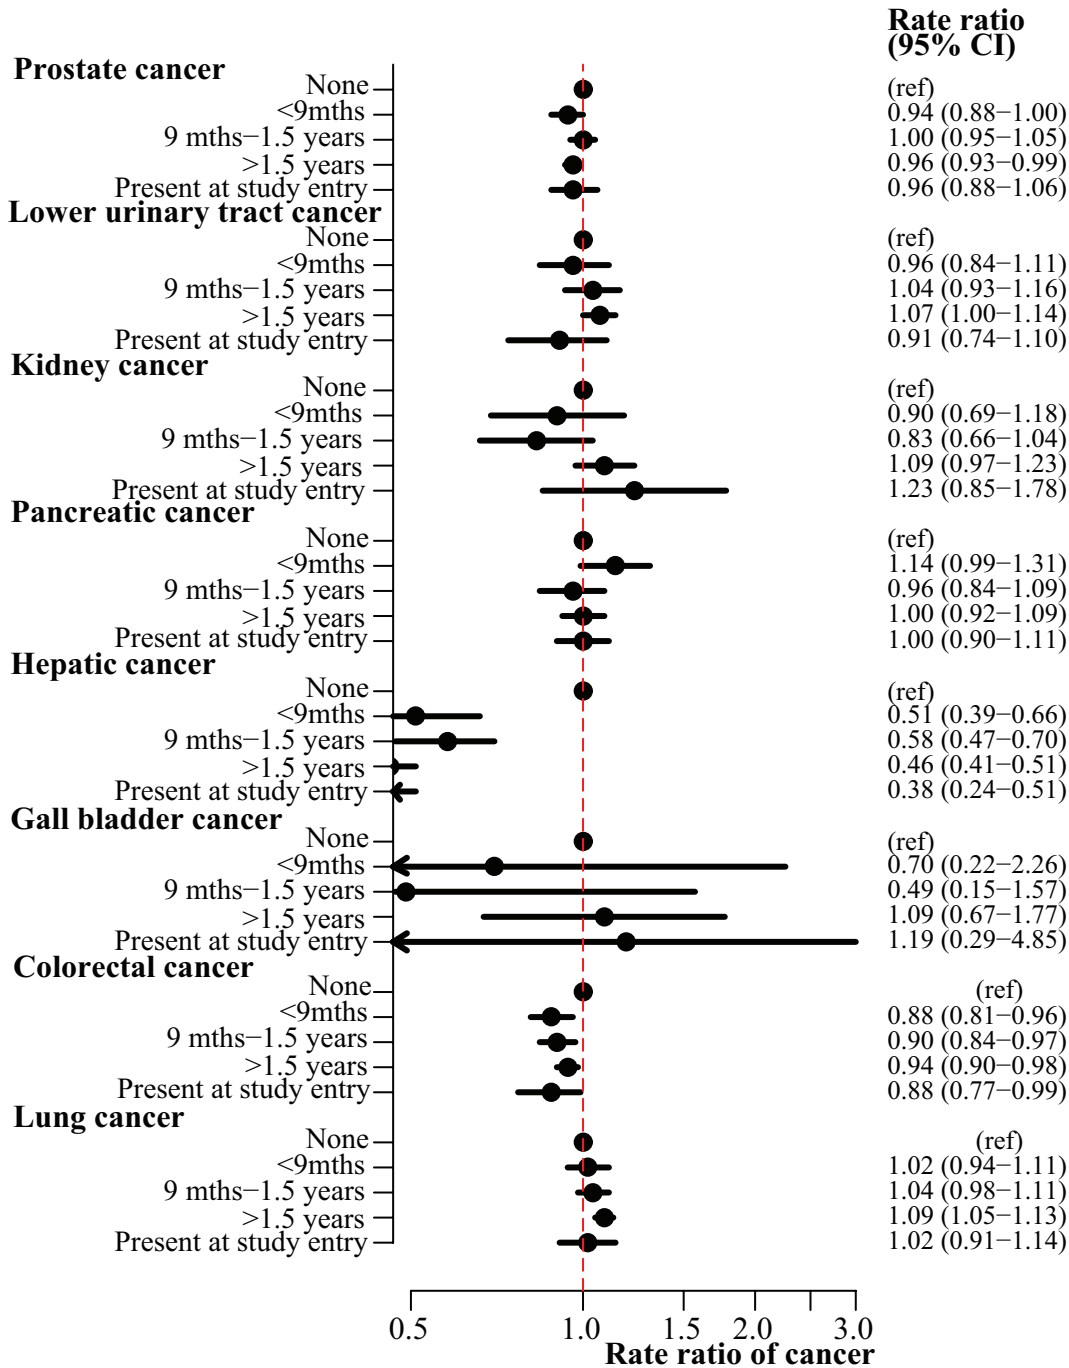

Supplement: 12885_2016_2122_MOESM1_ESM.pdf [file 12885_2016_2122_MOESM1_ESM.pdf]
